# Supplementary material
Source: PubMed Central journal article supplement (PMC5568975)
Supplement: NIHMS844625-supplement-Supp_Info.pdf [file NIHMS844625-supplement-Supp_Info.pdf]

# Supporting Information

**Title:** Self-Esteem and Family Functioning as Predictors and Moderators of Treatment Outcomes in Ethnically-Diverse Obese Youth with Abnormal Glucose Tolerance

**Running Title:** Self-Esteem and Family Functioning in Obesity

Jerome H. Taylor, MD; Yaqing Xu, BS; Fangyong Li, MPH; Melissa Shaw, BS; James Dziura, PhD; Sonia Caprio, MD; William V. Tamborlane, MD; Paulina Nowicka, PhD\*; Mary Savoye, RD, CDE\*

\*Equal contributions as Senior Authors.

**Correspondence** to Jerome H. Taylor, MD, Yale Child Study Center, 230 South Frontage Road, New Haven, CT, USA 06519; email: Jerome.Taylor@yale.edu; telephone: 203-936-7716.

**Coauthor Emails:** Yaqing.Xu@yale.edu; Fangyong.Li@yale.edu; Melissa.Shaw@yale.edu; James.Dziura@yale.edu; Sonia.Caprio@yale.edu; William.Tamborlane@yale.edu; Paulina.Nowicka@ikv.uu.se; Mary.Savoye@yale.edu.

**Table S1.** Baseline Self-Esteem and Family Functioning

| Baseline Variables                       | Total<br>(n = 58) | Bright Bodies<br>(n = 31) | Clinic Care<br>(n = 27) | PValue      |
|------------------------------------------|-------------------|---------------------------|-------------------------|-------------|
|                                          | Mean (SD)         | Mean (SD)                 | Mean (SD)               |             |
| <b>Piers-Harris Self Concept Scale</b>   |                   |                           |                         |             |
| <b>T-Scores</b>                          |                   |                           |                         |             |
| Behavioral Adjustment                    | 53.2 (9.8)        | 52.2 (9.6)                | 54.4 (10.2)             | <b>0.42</b> |
| Intellectual and School Status           | 51.5 (8.8)        | 50.8 (8.8)                | 52.3 (9.0)              | <b>0.55</b> |
| Physical Appearance and Attributes       | 50.9 (9.5)        | 49.9 (8.4)                | 52.3 (10.7)             | <b>0.35</b> |
| Freedom From Anxiety                     | 50.3 (11.1)       | 50.2 (10.1)               | 50.4 (12.4)             | <b>0.96</b> |
| Popularity                               | 49.3 (10.2)       | 48.3 (8.2)                | 50.5 (12.2)             | <b>0.44</b> |
| Happiness and Satisfaction               | 53.0 (9.8)        | 53.8 (8.3)                | 52.0 (11.6)             | <b>0.48</b> |
| Total Score                              | 55.3 (10.8)       | 54.6 (9.1)                | 56.2 (12.8)             | <b>0.59</b> |
|                                          |                   |                           |                         |             |
| <b>McMaster Family Assessment Device</b> |                   |                           |                         |             |
| Problem Solving                          | 2.0 (0.41)        | 2.0 (0.4)                 | 2.0 (0.4)               | <b>0.95</b> |
| Communication                            | 2.1 (0.40)        | 2.0 (0.3)                 | 2.2 (0.4)               | <b>0.05</b> |
| Roles                                    | 2.2 (0.36)        | 2.3 (0.3)                 | 2.2 (0.4)               | <b>0.42</b> |
| Affective Responsiveness                 | 1.9 (0.46)        | 1.8 (0.4)                 | 2.0 (0.5)               | <b>0.20</b> |
| Affective Involvement                    | 2.0 (0.38)        | 1.9 (0.3)                 | 2.1 (0.4)               | <b>0.30</b> |
| Behavior Control                         | 1.7 (0.33)        | 1.6 (0.3)                 | 1.7 (0.3)               | <b>0.27</b> |
| General Functioning                      | 1.8 (0.37)        | 1.8 (0.3)                 | 1.8 (0.4)               | <b>0.93</b> |

Note: The McMaster Family Assessment Device Subscales were scored 1–4 with higher scores indicating poorer family functioning.
